# Supplementary material for: A validated HPLC-MS/MS method for the quantification of systemic mifepristone after subcutaneous application in mice
Source: Royal Society of Chemistry journal article supplement (doi:10.1039/d4ay00546e), 2024-01-01
Supplement: d4ay00546e1.pdf [file d4ay00546e1.pdf]

## Supplementary Information

### A validated HPLC-MS/MS method for the quantification of systemic mifepristone after subcutaneous application in mice

Julia Tevini,<sup>a</sup> Sepideh Aminzadeh-Gohari,<sup>abc</sup> Daniela D. Weber,<sup>a</sup> Luca Catalano,<sup>a</sup> Victoria E. Stefan,<sup>ad</sup> Elisa Redl,<sup>bc</sup> Chiara Herzog,<sup>bc</sup> Roland Lang,<sup>e</sup> Martin Widschwendter,<sup>bcdg</sup> Thomas K. Felder,<sup>\*hi</sup> and Barbara Kofler<sup>\*a</sup>

---

<sup>a</sup>Research Program for Receptor Biochemistry and Tumor Metabolism, Department of Pediatrics, University Hospital of the Paracelsus Medical University, Salzburg, Austria.

<sup>b</sup>European Translational Oncology Prevention and Screening (EUTOPS) Institute, Universität Innsbruck, Innsbruck, Hall in Tirol, Austria.

<sup>c</sup>Institute for Biomedical Aging Research, Universität Innsbruck, Innsbruck, Austria.

<sup>d</sup>Department of Biosciences, Paris Lodron University of Salzburg, Salzburg, Austria.

<sup>e</sup>Department of Women's and Children's Health, Karolinska Institutet and Karolinska University Hospital, Stockholm, Sweden.

<sup>f</sup>Department of Dermatology and Allergology, University Hospital of the Paracelsus Medical University, Salzburg, Austria.

<sup>g</sup>Department of Women's Cancer, University College London, London, UK.

<sup>h</sup>Department of Laboratory Medicine, Paracelsus Medical University, Salzburg, Austria.

<sup>i</sup>Institute of Pharmacy, Paracelsus Medical University, Salzburg, Austria.

\* Corresponding authors: Thomas K. Felder, [t.felder@salk.at](mailto:t.felder@salk.at); Barbara Kofler, [b.kofler@salk.at](mailto:b.kofler@salk.at)

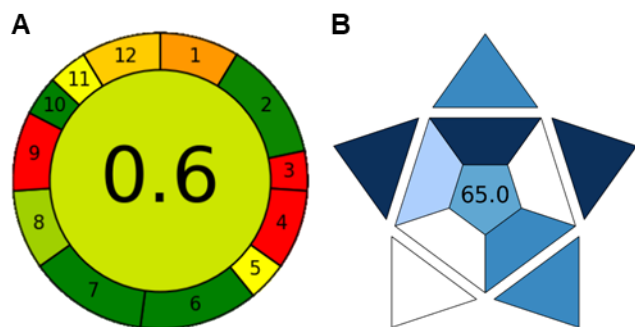

S-Figure 1: Results from the assessment of the greenness and applicability of the analytical method according “Analytical GREENness calculator (AGREE)” (A) and “blue applicability grade index (BAGI)” (B), ref. (1, 2).

## References

1. Manousi N, Wojnowski W, Płotka-Wasyłka J, Samanidou V. Blue applicability grade index (BAGI) and software: a new tool for the evaluation of method practicality. *Green Chemistry*. 2023;25(19):7598-604.
2. Pena-Pereira F, Wojnowski W, Tobiszewski M. AGREE-Analytical GREENness Metric Approach and Software. *Anal Chem*. 2020;92(14):10076-82.
